# Supplementary material for: Conditions for success of engineered underdominance gene drive systems
Source: PubMed Central journal article supplement (PMC5562440; doi:10.1016/j.jtbi.2017.07.014), 2017-10-07
Supplement: mmc1.pdf [file mmc1.pdf]

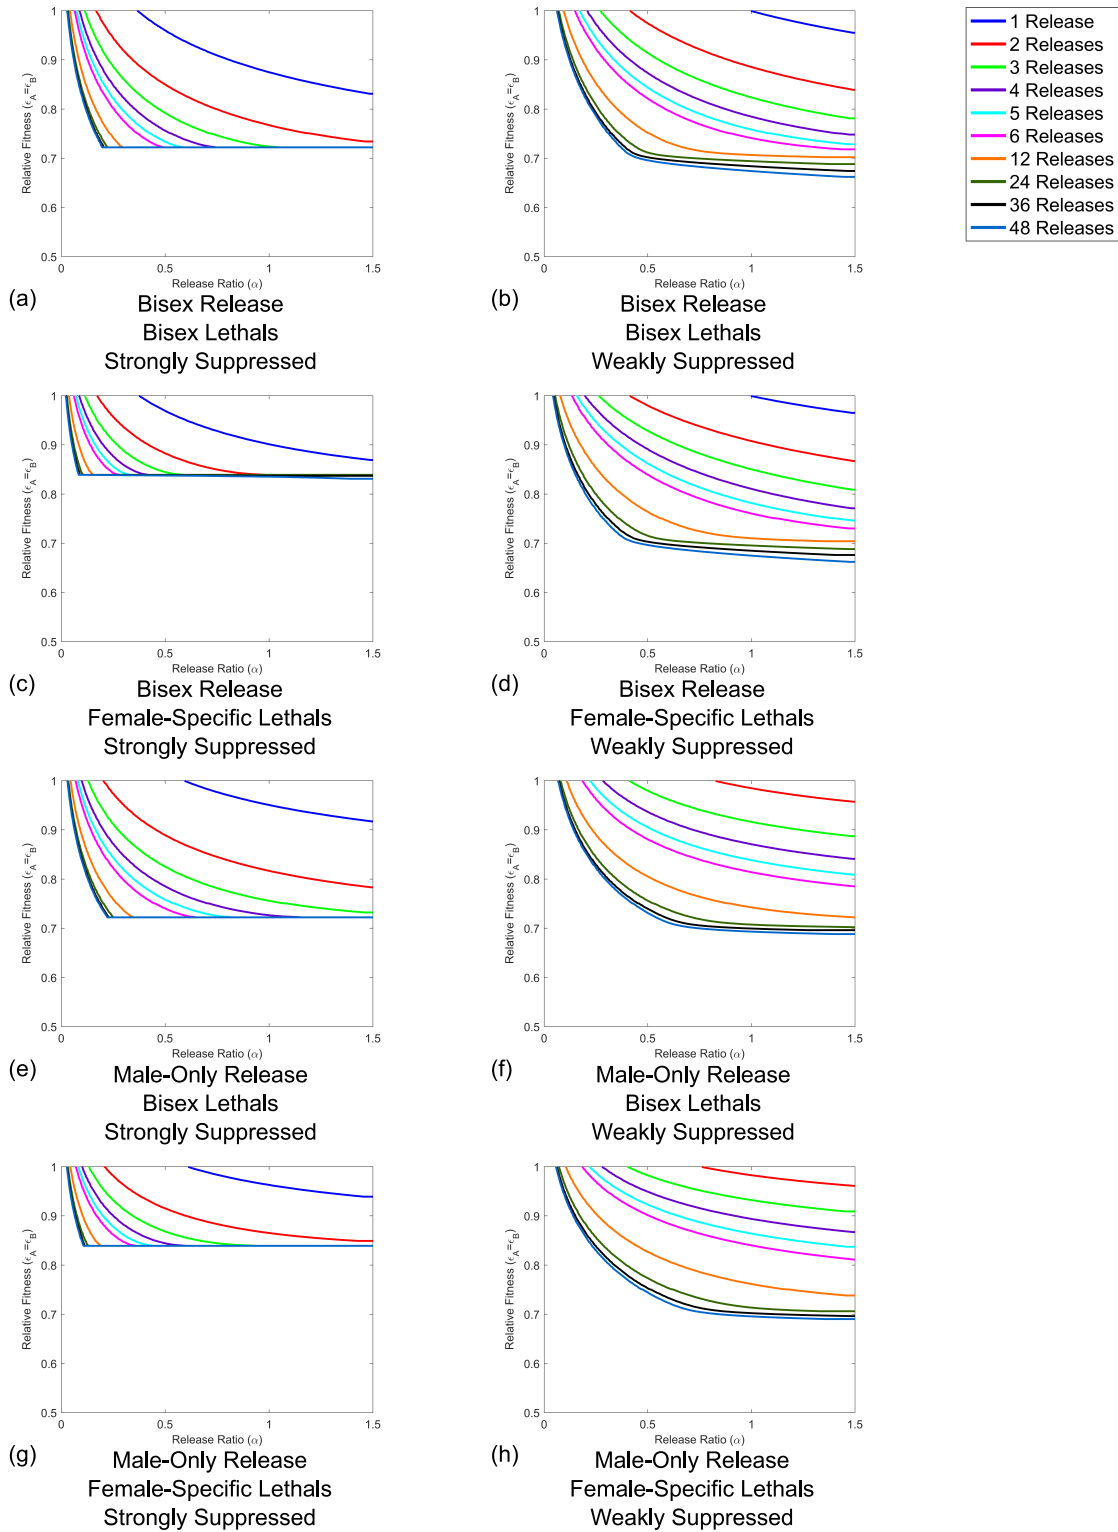

**Figure S1: Different multiple release strategies and genetic systems produce different conditions for transgene introgression.** Here each panel represents a more detailed view of the low release ratio regions of Figure 6 in the main text. Each line represents the threshold above which introgression of transgenes into a population is achieved with colours representing different numbers of releases. Details of the scenario considered in each panel are given in the respective labels. Single male-only release of weakly suppressed lethals cannot give introgression even for very large release ratios, hence the omission of a single release threshold line in panels (f) and (h).
